# Supplementary material for: Relations of magnesium intake to cognitive impairment and dementia among participants in the Women’s Health Initiative Memory Study: a prospective cohort study
Source: PubMed Central journal article supplement — BMJ Open. 2019 Nov 3;9(11):e030052. doi: 10.1136/bmjopen-2019-030052 (PMC6858129; doi:10.1136/bmjopen-2019-030052), 2019-11-03
Supplement: bmjopen-2019-030052supp001.pdf [file bmjopen-2019-030052supp001.pdf]

Supplementary Figure 1 Identification of an Analytical Cohort from the Women's Health Initiative Memory Study (WHI-MS)

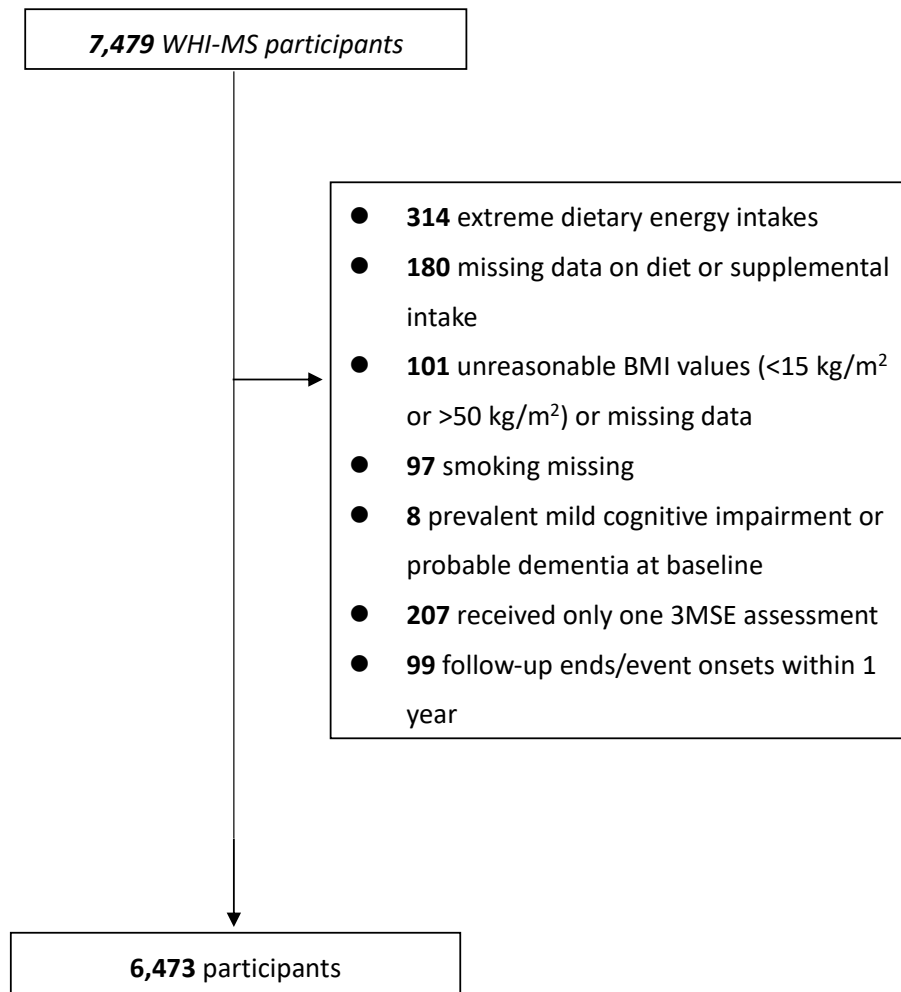

Supplementary Table 1 Baseline Characteristics of Participants Included or Excluded from Analysis

|                                            | Mean (SD) / N (%) |                | p value |
|--------------------------------------------|-------------------|----------------|---------|
|                                            | Excluded          | Included       |         |
| Number of participants                     | 1006              | 6473           |         |
| Time-to-event/censored in years            | 5.5 (5.3)         | 9.6 (4.3)      | ***     |
| Age at baseline in years                   | 70.3 (3.9)        | 70.1 (3.8)     | NS      |
| BMI at baseline                            | 29.5 (7.5)        | 28.4 (5.4)     | ***     |
| Recreational physical activity in MET-hour | 10.7 (13.8)       | 11.3 (13.2)    | NS      |
| Total magnesium intake in mg               | 251 (162.1)       | 311.1 (151.2)  | ***     |
| Total B6 intake in mg                      | 6.1 (21)          | 6.8 (28.4)     | NS      |
| Total B9 intake in mcg                     | 374.7 (272.4)     | 457.6 (273.5)  | ***     |
| Total B12 intake in mcg                    | 18.2 (63.6)       | 20.5 (73)      | NS      |
| Total calcium intake in mg                 | 871.3 (689.7)     | 1139.2 (698.8) | ***     |
| Total vitamin D intake in mcg              | 7.2 (6.5)         | 9.5 (6.7)      | ***     |
| Dietary energy in kcal                     | 1344.9 (976.7)    | 1605.1 (625.3) | ***     |
| Region in U.S.                             |                   |                |         |
| ● Northeast                                | 234 (23.3%)       | 1771 (27.4%)   | ***     |
| ● South                                    | 263 (26.1%)       | 1315 (20.3%)   |         |
| ● Midwest                                  | 208 (20.7%)       | 1598 (24.7%)   |         |
| ● West                                     | 301 (29.9%)       | 1789 (27.6%)   |         |
| Race/Ethnicity                             |                   |                | ***     |
| ● Non-Hispanic White                       | 810 (80.7%)       | 5683 (88.0%)   |         |
| ● Black or African-American                | 120 (12.0%)       | 415 (6.4%)     |         |
| ● Hispanic/Latino                          | 35 (3.5%)         | 144 (2.2%)     |         |
| ● Other                                    | 39 (3.9%)         | 217 (3.4%)     |         |
| HRT Arm                                    |                   |                | **      |
| ● E-alone                                  | 221 (22.0%)       | 1248 (19.3%)   |         |
| ● E-alone control                          | 227 (22.6%)       | 1257 (19.4%)   |         |
| ● E+P intervention                         | 289 (28.7%)       | 1935 (29.9%)   |         |
| ● E+P control                              | 269 (26.7%)       | 2033 (31.4%)   |         |
| 7+ alcohol drinks per week                 | 83 (8.5%)         | 810 (12.6%)    | ***     |
| Prevalent diabetes                         | 120 (12.0%)       | 507 (7.8%)     | ***     |
| Prevalent cardiovascular disease           | 204 (20.8%)       | 1083 (17.0%)   | **      |
| Prevalent cancer                           | 35 (3.6%)         | 232 (3.6%)     | NS      |
| Hormone Replacement Therapy                |                   |                | NS      |
| ● Never used                               | 702 (69.8%)       | 4444 (68.7%)   |         |
| ● Past user                                | 254 (25.2%)       | 1657 (25.6%)   |         |
| ● Current user                             | 50 (5.0%)         | 372 (5.7%)     |         |
| Treated high cholesterol                   | 194 (19.8%)       | 1151 (18.0%)   | NS      |
| History of hypertension                    | 424 (43.4%)       | 2492 (38.8%)   | **      |

|                                                    |             |              |     |
|----------------------------------------------------|-------------|--------------|-----|
| Family history of diabetes, heart attack or stroke | 768 (76.3%) | 4991 (77.1%) | NS  |
| Medication use <sup>a</sup>                        | 510 (50.7%) | 3009 (46.5%) | *   |
| Smoking status                                     |             |              | *** |
| ● Never Smoked                                     | 463 (51.7%) | 3446 (53.2%) |     |
| ● Past Smoker                                      | 333 (37.2%) | 2597 (40.1%) |     |
| ● Current Smoker                                   | 99 (11.1%)  | 430 (6.6%)   |     |
| Received college education or above                | 514 (51.2%) | 3761 (58.3%) | *** |

MCI: mild cognitive impairment; PD: probable dementia; HRT: Hormone replacement therapy; E-alone: Estrogen-alone; E+P: Estrogen+Progestin

\* $p < 0.05$ . \*\* $p < 0.01$  \*\*\* $p < 0.001$ . NS: not significant <sup>a</sup> Any use of anti-inflammatory, anti-hyperlipidaemic, anti-depressant, anti-hypertensive or diuretic drug
